# Supplementary material
Source: publisher site journal article supplement (http://kjim.org/upload/media/kjim-2023-347-Supplementary-Table-1.pdf)
Supplement: Supplementary file 1 [file kjim-2023-347-Supplementary-Table-1.pdf]

**Supplementary Table 1. Clinical characteristics of the patients with hospital-acquired COVID-19 according to the progression to critical illness**

| Variable                                              | Total<br>(n = 204) | Non-critical illness<br>(n = 167) | Critical illness<br>(n = 37) | p value |
|-------------------------------------------------------|--------------------|-----------------------------------|------------------------------|---------|
| <b>Pulmonary disease</b>                              |                    |                                   |                              |         |
| Chronic obstructive pulmonary disease/asthma          | 9 (4.4)            | 4 (2.4)                           | 5 (13.5)                     | 0.011   |
| Pulmonary tuberculosis <sup>a)</sup>                  | 3 (1.5)            | 2 (1.2)                           | 1 (2.7)                      | > 0.999 |
| Interstitial lung disease                             | 5 (2.5)            | 3 (1.8)                           | 2 (5.4)                      | 0.486   |
| Pneumoconiosis                                        | 2 (1.0)            | 2 (1.2)                           | 0 (0.0)                      | > 0.999 |
| Nontuberculous mycobacteria pulmonary disease         | 3 (1.5)            | 2(1.2)                            | 1 (2.7)                      | > 0.999 |
| Obesity hypoventilation syndrome                      | 1 (0.5)            | 0 (0.0)                           | 1 (2.7)                      | 0.407   |
| Lung graft-versus-host disease                        | 1 (0.5)            | 0 (0.0)                           | 1 (2.7)                      | 0.407   |
| Bronchial stenosis after lung transplant              | 1 (0.5)            | 1 (0.6)                           | 0 (0.0)                      | > 0.999 |
| Congenital pulmonary airway malformation              | 1 (0.5)            | 1 (0.6)                           | 0 (0.0)                      | > 0.999 |
| Chronic cavitary pulmonary aspergillosis              | 1 (0.5)            | 1 (0.6)                           | 0 (0.0)                      | > 0.999 |
| <b>Cardiovascular disease</b>                         |                    |                                   |                              |         |
| Heart failure                                         | 18 (8.8)           | 14 (8.4)                          | 4 (10.8)                     | 0.880   |
| Ischemic heart disease                                | 25 (12.3)          | 21 (12.6)                         | 4 (10.8)                     | 0.985   |
| Arrhythmia                                            | 13 (6.4)           | 10 (6.0)                          | 3 (8.1)                      | 0.916   |
| Peripheral vascular disease                           | 3 (1.5)            | 2 (1.2)                           | 1 (2.7)                      | > 0.999 |
| Cardiac valve disease                                 | 6 (2.9)            | 3 (1.8)                           | 3 (8.1)                      | 0.129   |
| Abdominal aortic aneurysm                             | 2 (1.0)            | 2 (1.2)                           | 0 (0.0)                      | > 0.999 |
| Pericarditis                                          | 1 (0.5)            | 1 (0.6)                           | 0 (0.0)                      | > 0.999 |
| <b>Vital sign</b>                                     |                    |                                   |                              |         |
| Body temperature (°C)                                 | 37.6 ± 0.9         | 37.5 ± 0.8                        | 37.7 ± 1.0                   | 0.458   |
| SpO <sub>2</sub> (%)                                  | 96 (95–97)         | 96 (95–97)                        | 95 (93–96)                   | < 0.001 |
| Heart rate (beats/min)                                | 90 (73–107)        | 87 (71–104)                       | 106 (89–120)                 | < 0.001 |
| Respiration rate (breaths/min)                        | 20 (18–20)         | 18 (18–20)                        | 22 (20–25)                   | < 0.001 |
| Mean blood pressure (mmHg)                            | 92 (78–104)        | 92 (78–103)                       | 90 (77–108)                  | 0.730   |
| <b>Laboratory</b>                                     |                    |                                   |                              |         |
| White blood cell (10 <sup>3</sup> /uL)                | 6.86 (4.63–8.84)   | 6.42 (4.63–8.22)                  | 8.62 (5.72–13.66)            | 0.006   |
| Hemoglobin (g/dL)                                     | 10 (9–11)          | 10 (9–12)                         | 9 (8–10)                     | < 0.001 |
| Platelet (10 <sup>3</sup> /uL)                        | 204 (126–292)      | 215 (137–293)                     | 148 (77–265)                 | 0.037   |
| S/F ratio (mmHg)                                      | 452 (400–462)      | 457 (448–462)                     | 339 (194–452)                | < 0.001 |
| PRIEST COVID-19 clinical severity score <sup>b)</sup> | 8 (7–11)           | 8 (6–10)                          | 13 (11–14)                   | < 0.001 |
| 4C mortality score for COVID-19 <sup>c)</sup>         | 8.5 ± 3.5          | 8.0 ± 3.3                         | 10.6 ± 3.7                   | < 0.001 |

Values are presented as number (%), mean ± standard deviation, or median (interquartile range).

COVID-19, coronavirus disease 2019; SpO<sub>2</sub>, oxygen saturation; S/F ratio, oxygen saturation/fraction of inspired oxygen ratio; PRIEST, Pandemic Respiratory Infection Emergency System Triage.

<sup>a)</sup>Pulmonary tuberculosis and tuberculosis destroyed lung.

<sup>b)</sup>PRIEST COVID-19 clinical severity score designed to predict the adverse outcomes (death or major organ support) of COVID-19 patients.

<sup>c)</sup>4C mortality score for COVID-19 predict the risk of mortality in COVID-19 patients.
